# Supplementary material for: Evaluating Health Related Quality of Life and Healthcare Utilization Among Adults with Concurrent Cancer and Chronic Kidney Disease: Medical Expenditure Panel Survey
Source: Research Square preprint supplement (doi:10.21203/rs.3.rs-8058673/v1), 2026-02-12
Supplement: Supplementary file 1 [file 87f8690cfc1164a84304cf42.xlsx]

## Sheet: Table 1 Patient Characteristics
Table 1: Patient Characteristics and Demographic Information
	Total N	Neither Cancer nor CKD N(%)	Cancer Only N(%)	CKD Only N(%)	Both CKD and Cancer N(%)	P-value
	235057	229,468 (97.6)	4268 (1.8)	862 (0.4)	441 (0.2)
Sex						0.296
Female	116, 118 (49.4)	113366 (97.2)	2108 (1.9)	426 (0.5)	218 (0.4)
Male	118, 939 (50.6)	116119 (97.4)	2160 (1.8)	436 (0.5)	224 (0.3)
Age						0.02
18-44	44,426 (18.9)	43373 (97.3)	807 (1.6)	163 (0.6)	83 (0.5)
45-64	92, 377 (39.3)	90188 (97.1)	1677 (2.0)	339 (0.6)	173 (0.3)
64+	98, 254 (41.8)	95925 (97.5)	1784 (1.8)	360 (0.5)	185 (0.2)
Race						<0.001
African American	48, 656 (20.7)	47504 (97.3)	883 (2.1)	178 (0.4)	91 (0.2)
Others	37, 373 (15.9)	36488 (97.6)	678 (1.6)	137 (0.5)	70 (0.3)
White	149, 028 (63.4)	145494 (97.2)	2707 (1.9)	547 (0.6)	280 (0.3)
Marital Status						0.042
Married	144, 794 (61.6)	141363 (97.5)	2629 (1.9)	530 (0.4)	272 (0.2)
Divorced/Widowed/Separated	76, 157 (32.4)	74353 (97.4)	1382 (1.8)	279 (0.5)	143 (0.3)
Never Married	14, 106 (6.0)	13770 (97.6)	257 (2.1)	53 (0.2)	26 (0.1)
Income						<0.001
Low Income	77, 703 (33.1)	75960 (97.7)	1412 (1.7)	285 (0.4)	146 (0.2)
Middle Income	82, 739 (35.2)	80779 (98.0)	1502 (1.4)	303 (0.4)	155 (0.2)
High Income	74, 615 (31.8)	72747 (97.4)	1354 (1.8)	274 (0.3)	240 (0.2)
Insurance Coverage						<0.001
Private	99, 428 (42.3)	97072 (97.3)	1805 (2.0)	364 (0.3)	187 (0.2)
Public	90, 497 (38.5)	88352 (97.9)	1643 (1.3)	332 (0.5)	170 (0.3)
Uninsured	45, 132 (19.2)	44062 (97.4)	820 (2.0)	166 (0.4)	84 (0.2)
Prescription Drug Coverage						<0.001
Yes	184, 989 (78.7)	180605 (97.5)	3359 (1.7)	678 (0.5)	347 (0.3)
No	50, 068 (21.3)	48881 (97.3)	909 (1.9)	184 (0.4)	94 (0.2)
Comorbidities						<0.001
No Comorbidity	62759 (26.7)	61273 (97.4)	1139 (1.9)	230 (0.3)	117 (0.1)
>=2	117, 293 (49.9)	114513 (97.9)	2129 (1.5)	431 (0.4)	220 (0.2)
>=3	46, 070 (19.6)	44979 (97.5)	836 (1.9)	169 (0.4)	86 (0.2)
>=4	8935 (3.8)	8721 (97.2)	164 (2.0)	32 (0.4)	18 (0.2)
Comorbidities
Congestive Heart Failure	43015(18.3)	41982 (97.3)	774 (1.9)	172 (0.5)	87 (0.3)
Stroke	41840 (17.8)	40835 (97.4)	753 (2.0)	167 (0.4)	85 (0.2)
COPD	17864 (7.6)	17435 (97.3)	321 (2.2)	71 (0.3)	37 (0.1)
Fall	32437(13.8)	31659 (97.9)	583 (1.5)	129 (0.4)	67 (0.2)
Hypertension	27971 (11.9)	27299 (97.7)	503 (1.7)	111 (0.4)	58 (0.2)
Diabetes	19039 (8.1)	18582 (98.0)	342 (1.4)	76 (0.4)	39 (0.2)
Abbreviations:
CKD - Chronic Kidney Disease
COPD - Chronic Obstructive Pulmonary Disorder
Footnotes:
P value of significance test <.05

## Sheet: Table 2 Factors - HRQOL
Table 2: Factors affecting HRQoL in patients with CKD and Cancer
Characteristic	PCS Scores		MCS Scores
	β (CI)	P value	β (CI)	P'-value
Age
18'-44	Reference		Reference
45'-64	'-1.46 (-1.77, -1.14)	0.001	-1.74 (-2.03, -1.44)	0.001
65+	-1.99 (-2.20, -1.77)	0.002	-1.62 (-1.91, -1.32)	0.001
Race
Whites	Reference		Reference
African American	−1.16 (-1.41, -0.90)	0.001	−1.11 (-1.48, -0.73)	<.001
Others	-1.01(-1.38, -0.63)	0.005	-1.04(-1.15, -0.92)	0.003
Marital Status
Married	Reference		Reference
Not Married	-1.02 (-1.17, -0.86)	0.007	−1.11 (-1.24, -0.97)	0.008
Income
High Income	Reference		Reference
Middle Income	−1.72 (-2.24, -1.19)	<.001	−1.03 (-1.63, -0.42)	0.005
Low Income	−2.50 (-3.38, -1.61)	<.001	−1.17 (-1.52, -0.81)	<.001
Insurance Coverage
Private	Reference		Reference
Public	−1.70 (-2.30, -1.09)	<.001	−1.07 9-1.50, -0.63)	<.001
Uninsured	−2.42 (-2.83, -1.99)	<.001	−2.38 (-2.92, -1.83)	<.001
Educational Status
Some college or more	Reference		Reference
High School Graduate	−0.72 (-1.15, -0.28)	0.001	−1.13 (-1.38, -0.87)	0.0015
Less than high school	−2.50 (-2.99, -2.01)	<.001	−1.87 (-2.28, -1.45)	<.001
Smoking Status
Non'-Smoker	Reference		Reference
Current Smoker	−2.08 (-3.39, -0.76)	.002	−1.99 (-2.93, -1.04)	<.001
Footnotes:
P value of significance test <.05
Abbreviations:
Reference '- Referenceerence group

## Sheet: Table 3 Factors - HRU
Table 3: Factors affecting HRU in patients with CKD and Cancer
Characteristic	Prescriptions Filled		Inpatient Services Used		Outpatient Services Used		Emergency Department Use
	β (CI)	P value	β (CI)	P value	β (CI)	P value	β (CI)	P value
Age
18-44	Ref		Ref		Ref		Ref
45-64	1.46 (1.14, 1.77)	0.001	1.44 (1.14, 1.73)	0.001	1.25 (0.95, 1.54)	0.001	1.22 (0.92, 1.51)	0.001
65+	1.66 (1.44, 1.87)	0.001	1.61 (1.33, 1.88)	0.001	1.99 (1.77, 2.20)	0.001	1.51 (1.27, 1.74)	0.001
Race
Whites	Ref		Ref		Ref		Ref
African American	1.16 (0.86, 1.45)	0.376	1.11 (0.79, 1.42)	0.005	1.15 (0.91, 1.38)	0.001	1.11 (0.73, 1.48)	<.001
Others	1.01 (0.89, 1.12)	0.501	1.04 (0.92, 1.15)	0.005	1.01 (0.83, 1.18)	0.005	1.02 (0.92, 1.11)	0.002
Marital Status
Married	Ref		Ref		Ref		Ref
Not Married	1.01 (0.97, 1.04)	0.409	1.11 (1.03, 1.18)	0.002	1.01 (0.85, 1.16)	0.002	1.11 (1.07, 1.14)	0.008
Income
High Income	Ref		Ref		Ref		Ref
Middle Income	1.41 (0.86, 1.41)	0.067	1.05 (0.05-2.04)	0.005	1.21 (0.60, 1.43)	<.001	1.02 (0.60, 1.43)	0.005
Low Income	1.50 (0.61, 2.38)	0.008	1.14 (1.01, 1.22)	<.001	1.50 (1.01, 1.99)	<.001	1.12 (0.76, 1.47)	<.001
Insurance Coverage
Private	Ref		Ref		Ref		Ref
Public	1.40 (0.40, 2.39)	0.002	1.04 (0.82, 1.25)	<.001	1.20 (0.78, 1.61)	<.001	1.02 (0.80, 1.23)	<.001
Uninsured	1.41 (1.19, 1.62)	<.001	1.52 (1.28, 1.75)	<.001	1.21 (0.99, 1.42)	<.001	1.28 (0.92, 1.63)	<.001
Educational Status
Some college or more	Ref		Ref		Ref		Ref
High School Graduate	0.41 (0.19, 0.62)	0.001	1.15 (0.85, 1.44)	0.0015	0.21 (0.88, 1.35)	0.001	1.12 (0.88, 1.35)	0.0015
Less than high school	1.5 (1.2, 1.79)	<.001	1.24 (1.02, 1.45)	<.001	1.50 (1.20, 1.79)	<.001	1.82 (1.60, 2.03)	<.001
Smoking Status
NonSmoker	Ref		Ref		Ref		Ref
Current Smoker	1.02 (0.23, 2.27)	0.009	1.66 (0.83, 2.48)	<.001	1.08 (0.06, 2.09)	.001	1.99 (1.44, 2.53)	<.001
Footnotes:
P value of significance test <.05
Abbreviations:
Ref - Reference group

## Sheet: Supp 1 Propensity Scores
Supplementary Table 1: Propensity Score Matching Results
	Neither Cancer nor CKD	CKD only	Cancer only	Both Cancer and CKD
					Standard difference
Subjects, n	403	397	411	423
Age, mean (sd)	51.9 (11.1)	53.1 (12.3)	54.3 (12.3)	55.3 (12.5)	0.17
Female,	155	169	201	128	0.11
Caucasians	284	280	289	288	0.24
African Americans	97	96	98	105	0.19
Others	22	21	24	30	0.2
Married	262	264	273	285	0.18
Divorced/Widowed/Separated	91	78	96	98	0.19
Never Married	50	45	42	40	0.21
Congestive heart failure	74	63	67	71	0.19
Stroke	72	65	79	76	0.13
COPD	31	25	33	31	0.06
Fall	56	52	51	52	0.04
Hypertension	48	33	35	41	0.05
Diabetes	36	20	34	38	0.06
Atrial Fibrillation	43	21	28	40	0.21
Mental Health Disorders	34	24	30	32	0.07
Fracture	5	2	2	2	0.05
Chronic liver disease	2	1	1	4	0.04
Rheumatoid arthritis	2	3	3	2	0.03
Abbreviations:
CKD - Chronic Kidney Disease
COPD - Chronic Obstructive Pulmonary Disorder
Footnotes:
P value of significance test <.05

## Sheet: Supp 2 Parameter - HRQOL
Supplementary Table 2: Parameter estimates and standard errors from linear regression for HRQOL.
	PCS		MCS
	Beta (CI)	p-value	Beta (CI)	p-value
Cancer Only	−1.01(-1.23, -0.79)	0.001	−1.14 (-1.43, -0.85)	0.002
CKD Only	−1.12 (-1.47, -0.77)	0.002	−1.28 (-1.69, -0.87)	0.003
Both Cancer and CKD	−1.49 (-1.92, -1.06)	0.015	−1.58 (-2.29, -087)	0.011
Neither Cancer nor CKD	Ref		Ref
Abbreviations:
CKD - Chronic Kidney Disease
PCS - Physical Component Summary Score
MCS - Mental Component Summary Score
SE - Standard Error
Ref - Reference Group
Footnotes:
P value of significance test <.05

## Sheet: Supp 3 Parameter - HRU
Supplementary Table 3: Parameter estimates and standard errors from linear regression for HRU.
	Prescriptions filled		Inpatient Services use		Outpatient Services use		Emergency Department Use
	Beta (CI)	Significance	Beta (CI)	Significance	Beta (CI)	Significance	Beta (CI)	Significance
Cancer Only	1.19 (0.95, 1.43)	0.001	1.12 (0.9, 1.34)	0.002	1.06 (0.77, 1.35)	0.002	1.07 (0.66, 1.48)	0.003
CKD Only	1.07 (0.62, 1.52)	0.002	1.15 (0.84, 1.46)	0.001	1.03 (0.60, 1.46)	0.004	1.18 (0.81, 1.55)	0.002
Both Cancer and CKD	1.93 (1.5, 2.36)	0.011	1.32 (1.03, 1.61)	0.001	1.24 (0.77, 1.71)	0.002	1.58 (1.25, 1.91)	0.001
Neither Cancer nor CKD	Ref		Ref		Ref		Ref
Abbreviations:
CKD - Chronic Kidney Disease
SE - Standard Error
Ref - Reference Group
Footnotes:
P value of significance test <.05
